# Supplementary material for: Targeting GRP78 suppresses oncogenic KRAS protein expression and reduces viability of cancer cells bearing various KRAS mutations
Source: PubMed Central journal article supplement — Neoplasia. 2022 Sep 24;33:100837. doi: 10.1016/j.neo.2022.100837 (PMC9516447; doi:10.1016/j.neo.2022.100837), 2022-09-24
Supplement: mmc1.pdf [file mmc1.pdf]

Supp. Table S1: Mutational status of *KRAS*, *NRAS*, and *HRAS* genes in human cell lines used in the study

| Organ    | Cell Line  | <i>KRAS</i> | <i>NRAS</i> | <i>HRAS</i> |
|----------|------------|-------------|-------------|-------------|
| Lung     | H460       | Q61H/Q61H   | WT          | WT          |
|          | A427       | G12D/WT     | WT          | WT          |
|          | H1299      | WT          | Q61K/WT     | WT          |
|          | H522       | WT          | WT          | WT          |
|          | H1975      | WT          | WT          | WT          |
|          | BEAS-2B    | WT          | WT          | WT          |
| Colon    | HCT116     | G13D/WT     | WT          | WT          |
|          | LS180      | G12D/WT     | WT          | WT          |
|          | RKO        | WT          | WT          | WT          |
|          | HT29       | WT          | WT          | WT          |
| Pancreas | PANC-1     | G12D/WT     | WT          | WT          |
|          | CFPAC-1    | G12V/WT     | WT          | WT          |
|          | MIA PaCa-2 | G12C/G12C   | WT          | WT          |
| Kidney   | HEK-293T   | WT          | WT          | WT          |

**Supp. Table S1**
